# Supplementary material
Source: Royal Society of Chemistry journal article supplement (doi:10.1039/d6ta01727d)
Supplement: d6ta01727d1.pdf [file d6ta01727d1.pdf]

## Supporting Information

### Rational design of B-Site single-atom doped LaMnO<sub>3</sub> for CO chemical looping combustion: a DFT study

#### Supplementary Figures

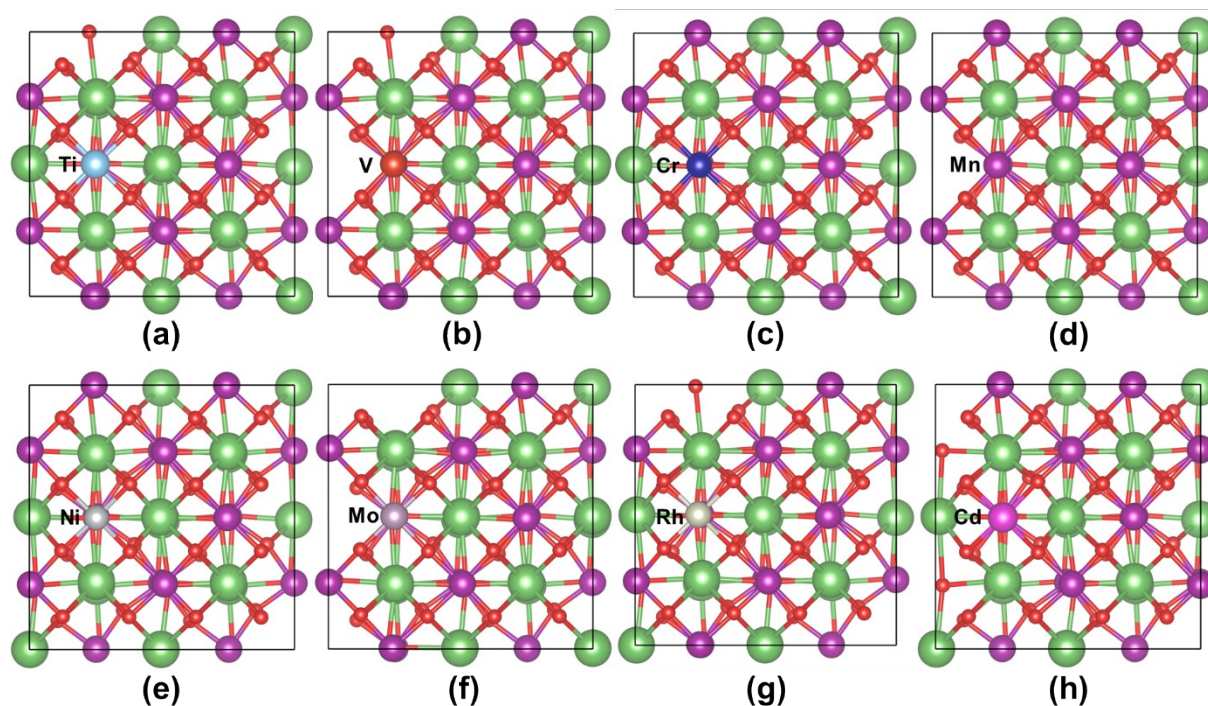

**Figure S1** Structures of (a) Ti–LaMnO<sub>3</sub>, (b) V–LaMnO<sub>3</sub>, (c) Cr–LaMnO<sub>3</sub>, (d) pristine LaMnO<sub>3</sub>, (e) Ni–LaMnO<sub>3</sub>, (f) Mo–LaMnO<sub>3</sub>, (g) Rh–LaMnO<sub>3</sub>, and (h) Cd–LaMnO<sub>3</sub>. Atom colours: Mn (purple), La (green), O (red), and C (brown).

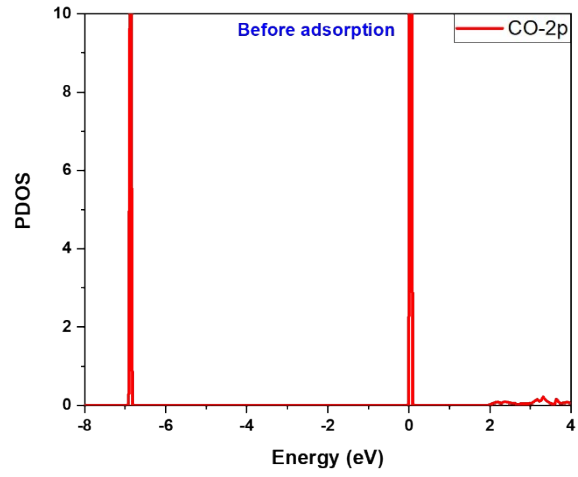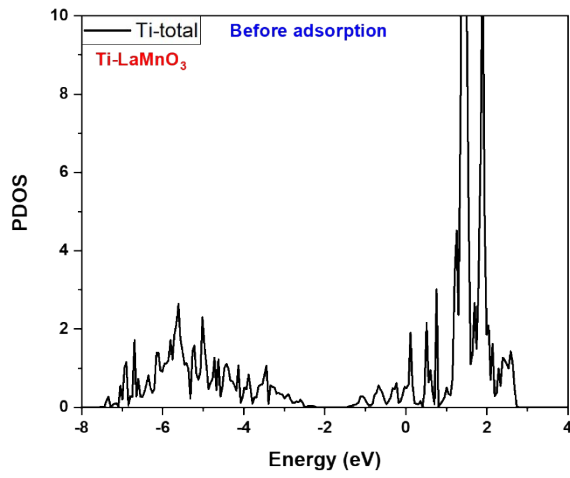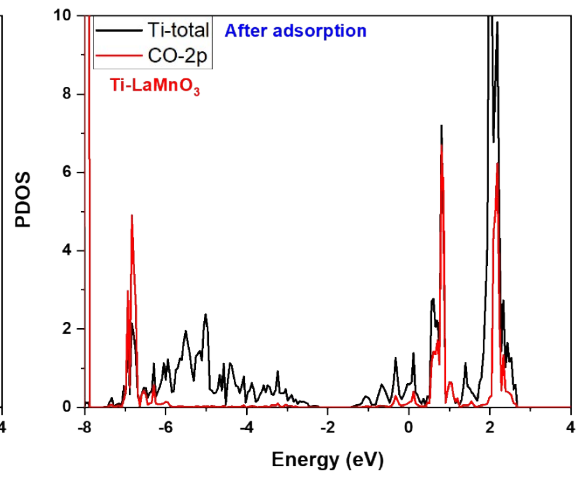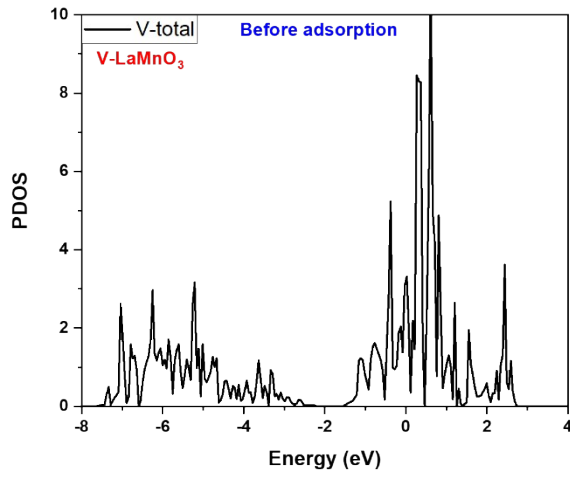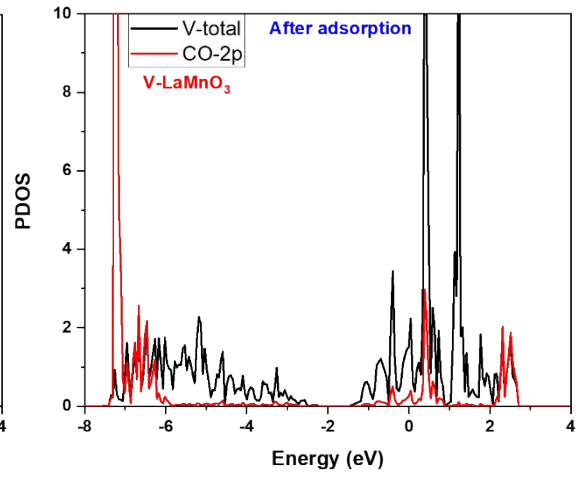

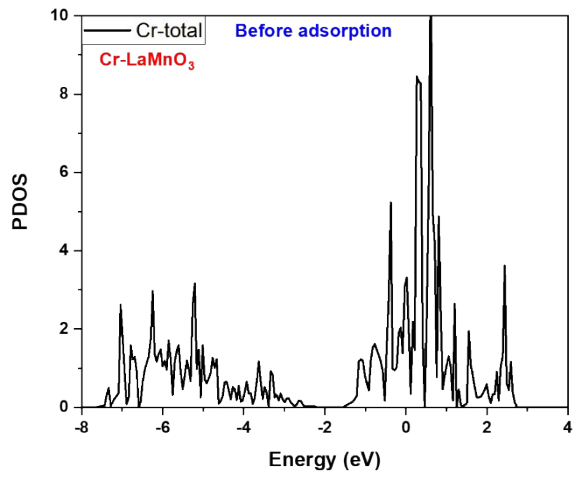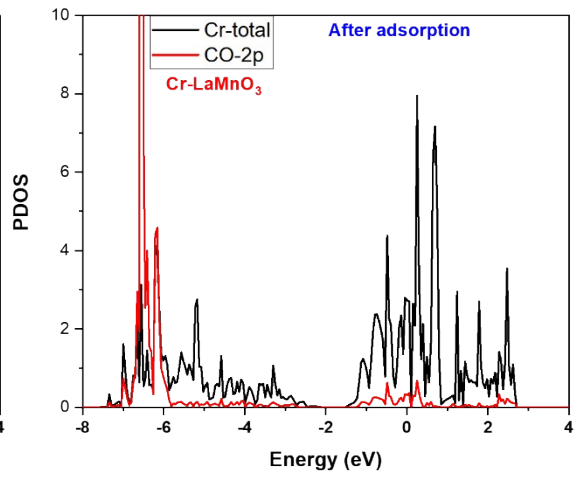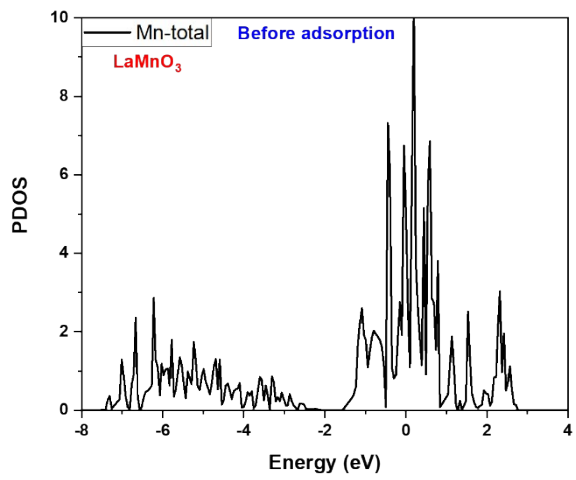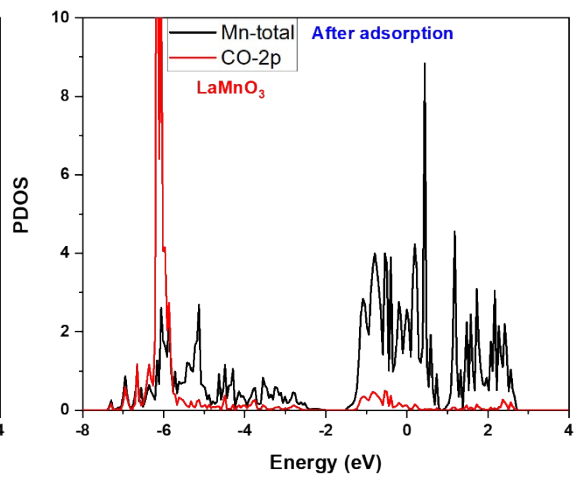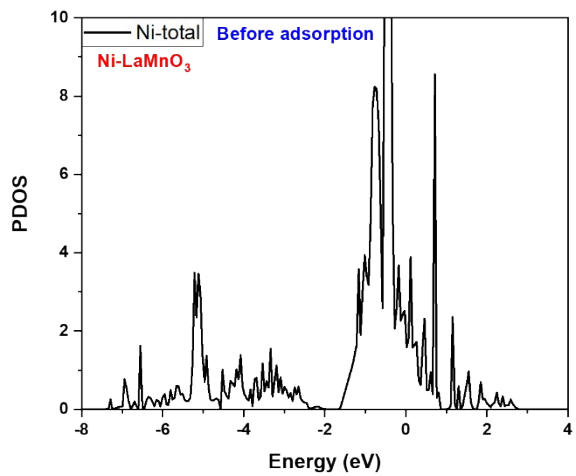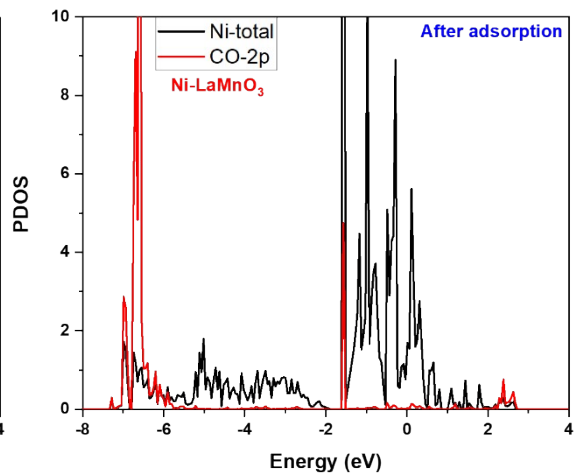

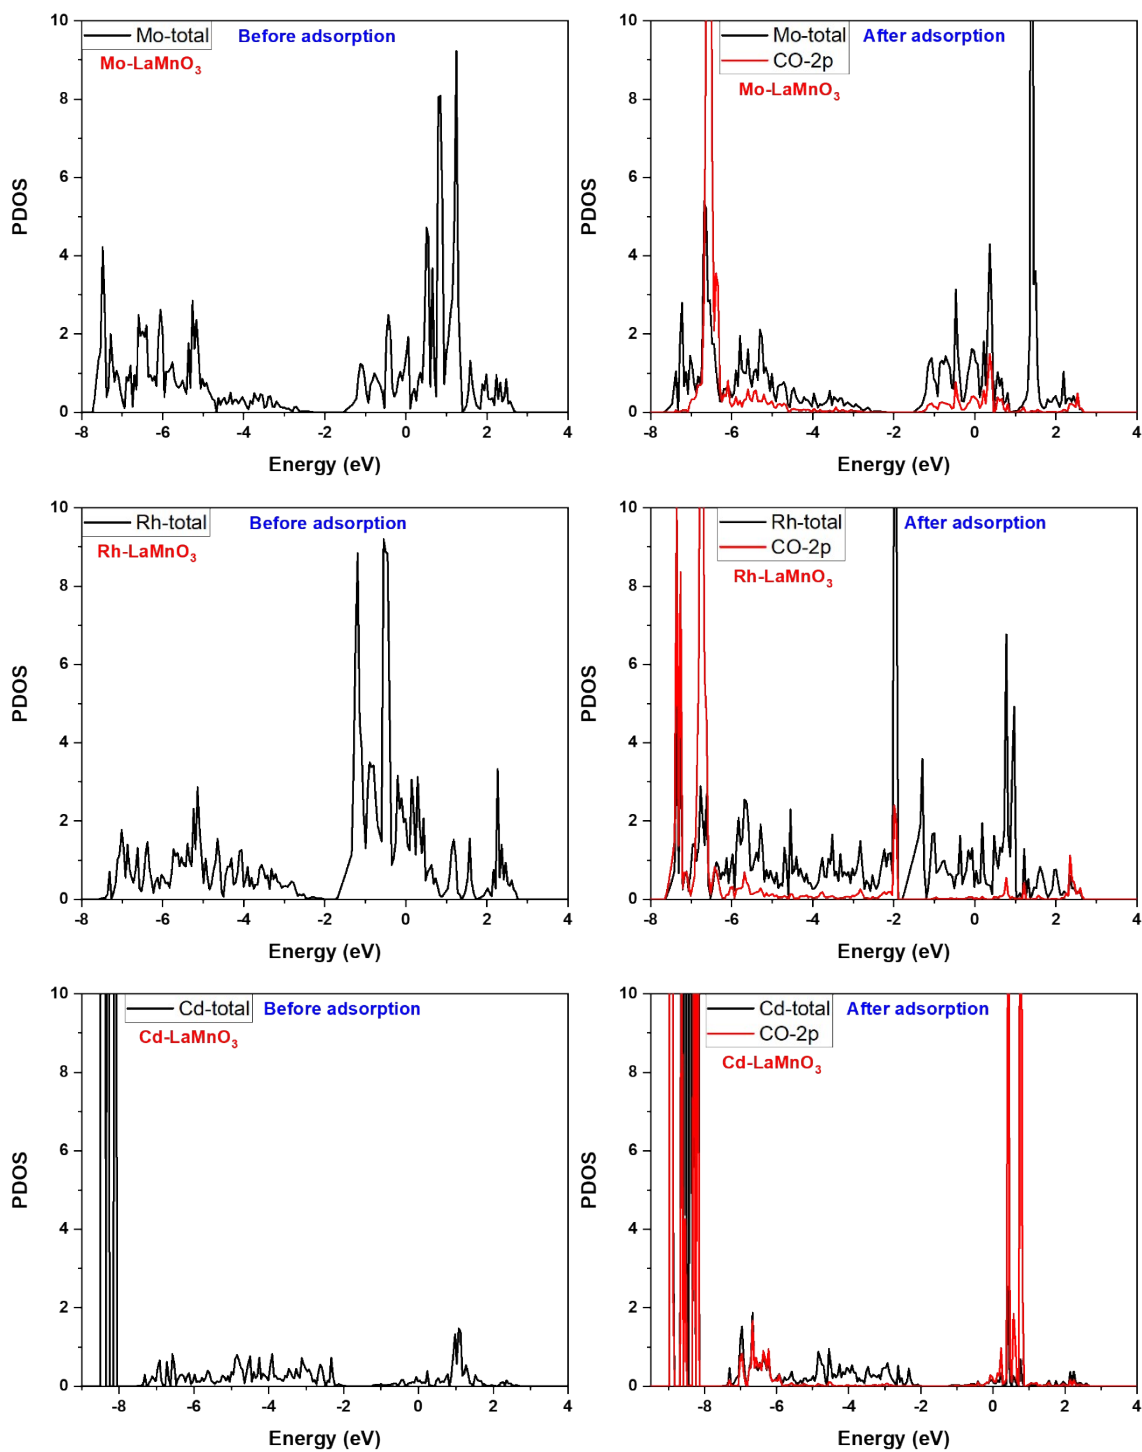

**Figure S2** The partial density of states (PDOS) of Ti-LaMnO<sub>3</sub>, V-LaMnO<sub>3</sub>, Cr-LaMnO<sub>3</sub>, pristine LaMnO<sub>3</sub>, Ni-LaMnO<sub>3</sub>, Mo-LaMnO<sub>3</sub>, Rh-LaMnO<sub>3</sub>, and Cd-LaMnO<sub>3</sub>, showing the total PDOS and the CO-2p states before and after CO adsorption on the catalysts.

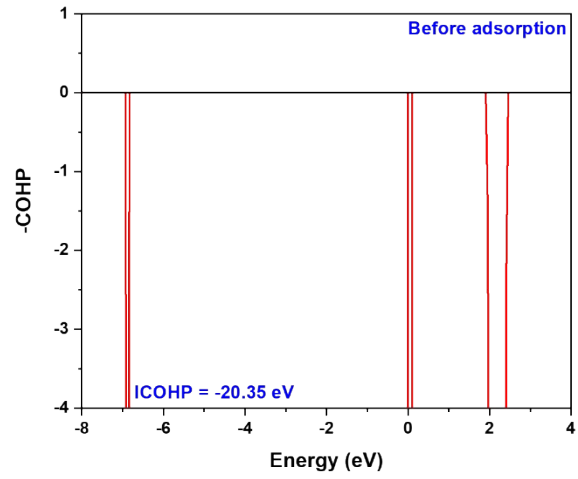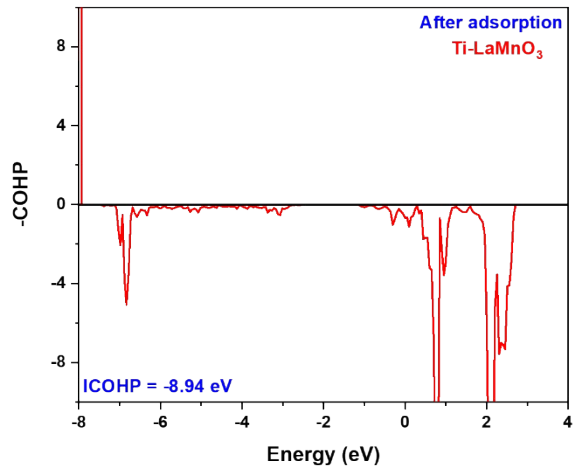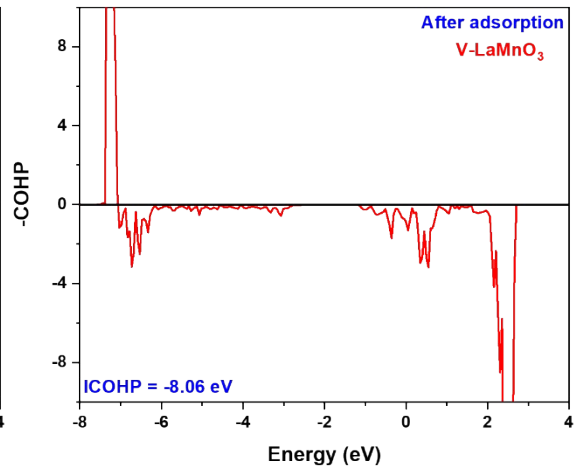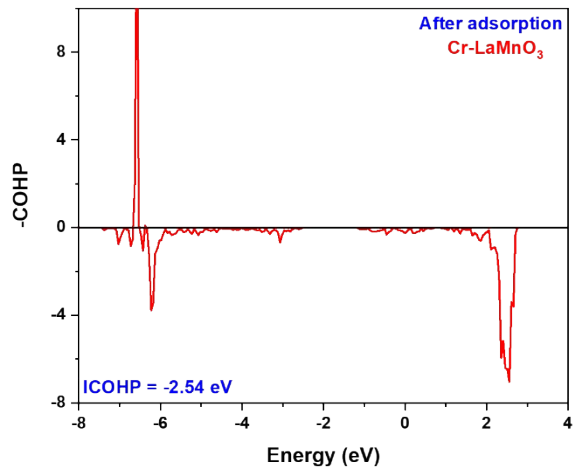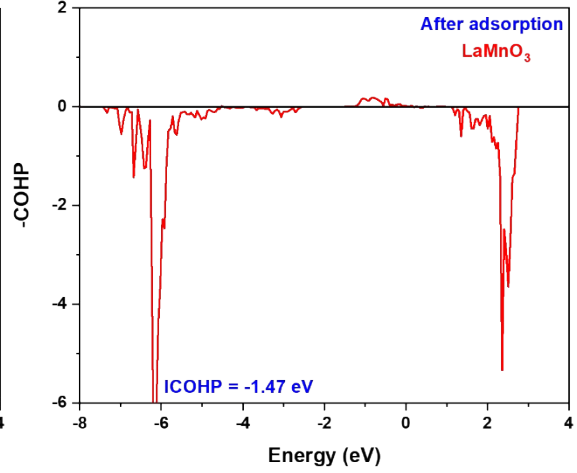

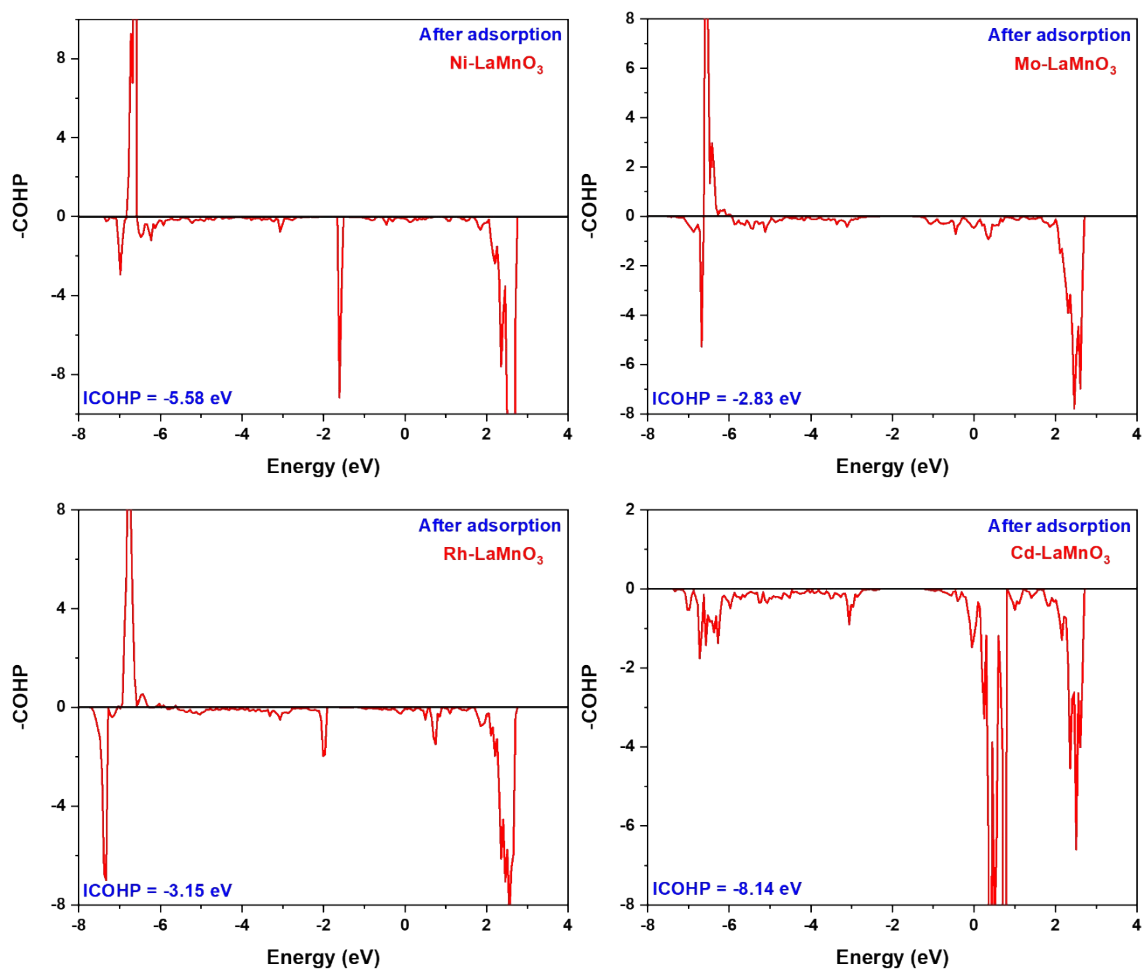

**Figure S3** Crystal orbital Hamilton population (COHP) for C-O interaction of CO before and after adsorption on Ti-LaMnO<sub>3</sub>, V-LaMnO<sub>3</sub>, Cr-LaMnO<sub>3</sub>, pristine LaMnO<sub>3</sub>, Ni-LaMnO<sub>3</sub>, Mo-LaMnO<sub>3</sub>, Rh-LaMnO<sub>3</sub>, and Cd-LaMnO<sub>3</sub>.

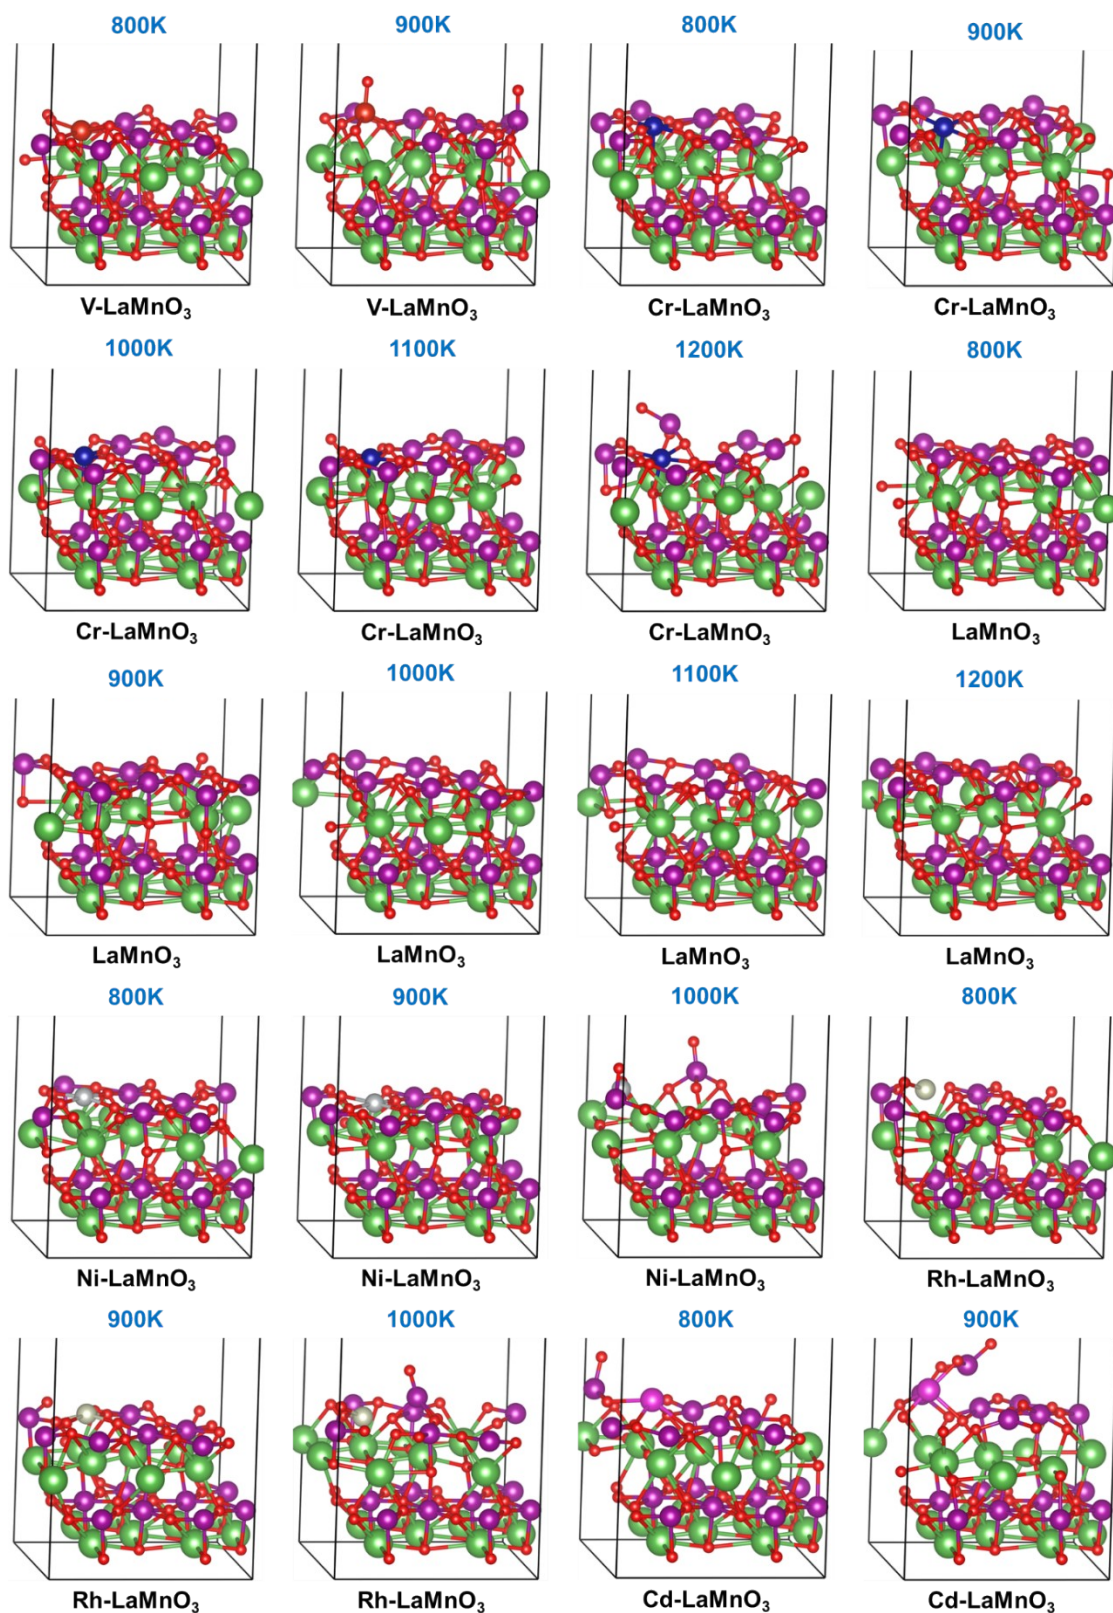

**Figure S4** Final configurations obtained from AIMD simulations of V-LaMnO<sub>3</sub>, Cr-LaMnO<sub>3</sub>, pristine LaMnO<sub>3</sub>, Ni-LaMnO<sub>3</sub>, Rh-LaMnO<sub>3</sub>, and Cd-LaMnO<sub>3</sub> at different temperatures (800–1200 K). Atom colours: Mn (purple), La (green), O (red), and C (brown).

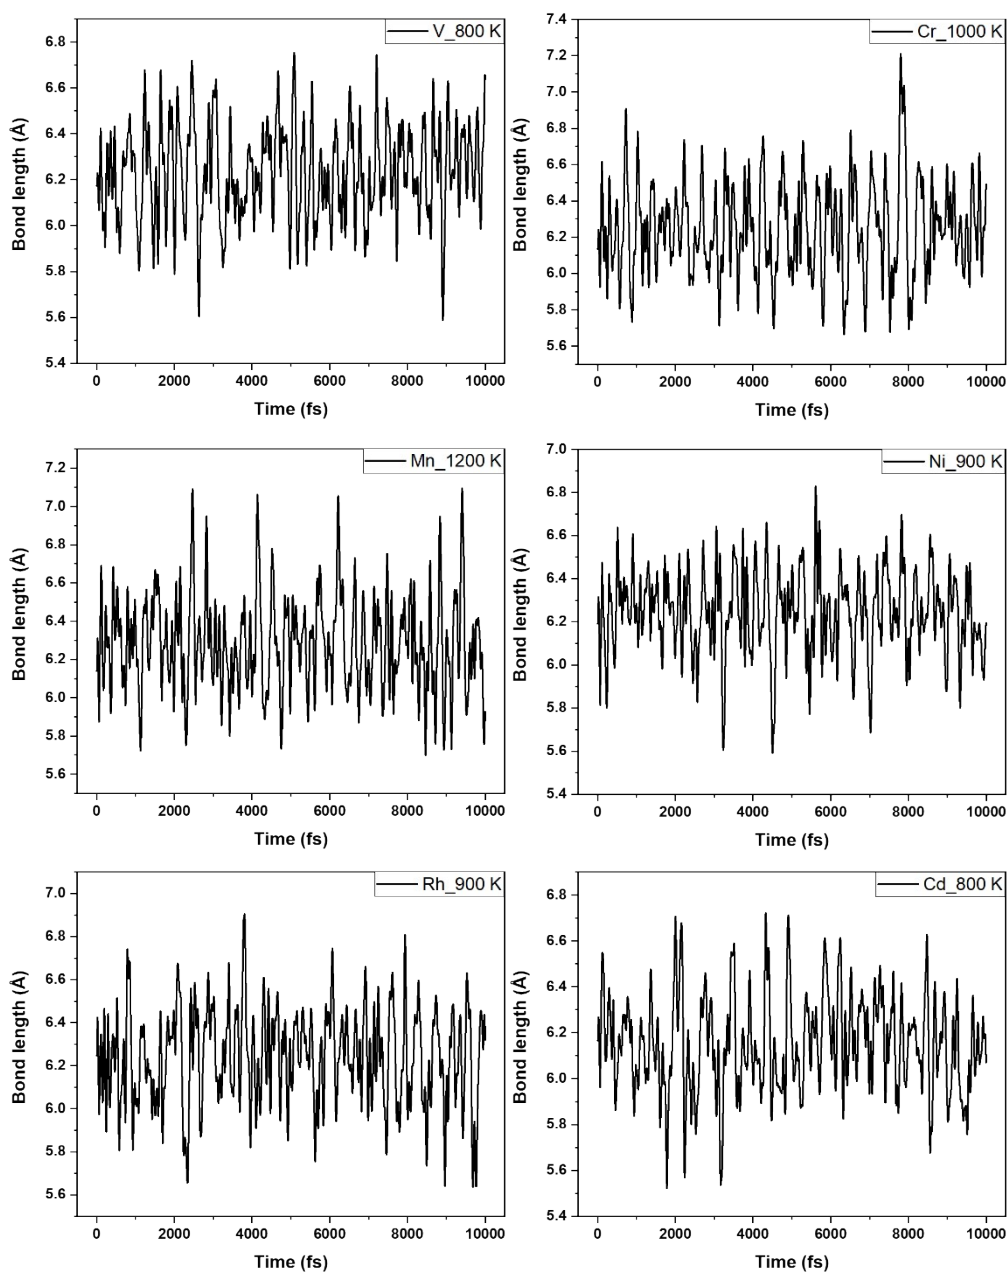

**Figure S5** Variation of the M–O<sub>1</sub> bond length during AIMD simulations for V–LaMnO<sub>3</sub> (800 K), Cr–LaMnO<sub>3</sub> (1000 K), pristine LaMnO<sub>3</sub> (1200 K), Ni–LaMnO<sub>3</sub> (900 K), Rh–LaMnO<sub>3</sub> (900 K), and Cd–LaMnO<sub>3</sub> (800 K).

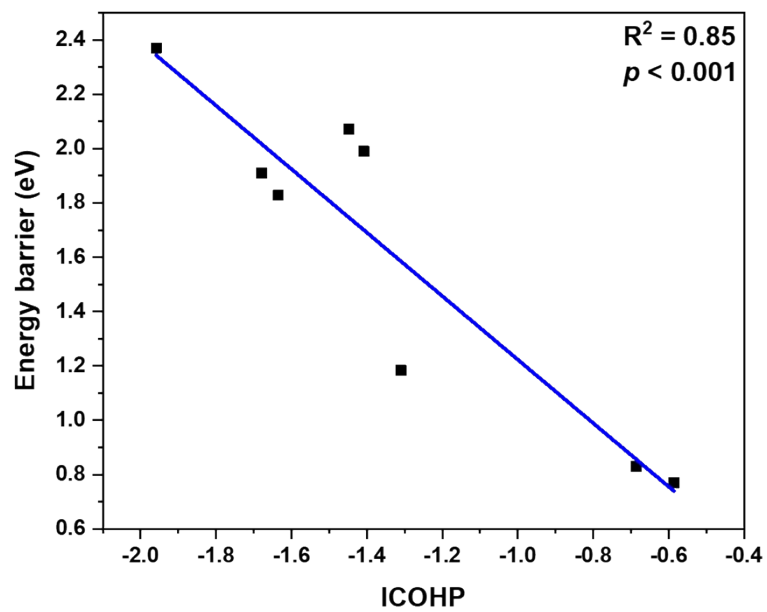

**Figure S6** Relationship between the reaction energy barrier and the M–O<sub>1</sub> bond strength as quantified by ICOHP.

## Supplementary Tables

**Table S1** Most stable phases according to Ellingham diagram (metal oxides at 800-1000K).

| <b>Dopant</b> | <b>Most stable phase</b>       | <b>Valance</b> | <b>Dopant</b> | <b>Most stable phase</b>       | <b>Valance</b> |
|---------------|--------------------------------|----------------|---------------|--------------------------------|----------------|
| <b>Sc</b>     | Sc <sub>2</sub> O <sub>3</sub> | 3              | <b>Rh</b>     | Rh <sub>2</sub> O <sub>3</sub> | 3              |
| <b>Ti</b>     | TiO <sub>2</sub>               | 4              | <b>Pd</b>     | PdO                            | 2              |
| <b>V</b>      | V <sub>2</sub> O <sub>5</sub>  | 5              | <b>Ag</b>     | Ag                             | 0              |
| <b>Cr</b>     | Cr <sub>2</sub> O <sub>3</sub> | 3              | <b>Cd</b>     | CdO                            | 2              |
| <b>Mn</b>     | Mn <sub>3</sub> O <sub>4</sub> | 2.7            | <b>Hf</b>     | HfO <sub>2</sub>               | 4              |
| <b>Fe</b>     | Fe <sub>3</sub> O <sub>4</sub> | 2.7            | <b>Ta</b>     | Ta <sub>2</sub> O <sub>5</sub> | 5              |
| <b>Co</b>     | Co <sub>3</sub> O <sub>4</sub> | 2.7            | <b>W</b>      | WO <sub>3</sub>                | 6              |
| <b>Ni</b>     | NiO                            | 2              | <b>Re</b>     | ReO <sub>3</sub>               | 6              |
| <b>Cu</b>     | Cu <sub>2</sub> O              | 1              | <b>Os</b>     | OsO <sub>2</sub>               | 4              |
| <b>Zn</b>     | ZnO                            | 2              | <b>Ir</b>     | IrO <sub>2</sub>               | 4              |
| <b>Mo</b>     | MoO <sub>3</sub>               | 6              | <b>Pt</b>     | PtO                            | 2              |
| <b>Tc</b>     | TcO <sub>2</sub>               | 4              | <b>Au</b>     | Au                             | 0              |
| <b>Ru</b>     | RuO <sub>2</sub>               | 4              |               |                                |                |

**Table S2** Summary of the electronegativity ( $\chi$ ), the first ionization energy ( $IE$ ), the atomic radius ( $r_{\text{atom}}$ ), and the +3 ionic radius ( $r_{\text{ion}}^{3+}$ ) of the dopant atoms.

| Dopant | $\chi$ | $IE$ (kJ/mol) | $r_{\text{atom}}$ (pm) | $r_{\text{ion}}^{3+}$ (pm) |
|--------|--------|---------------|------------------------|----------------------------|
| Sc     | 1.36   | 18.1          | 633.1                  | 74.5                       |
| Ti     | 1.54   | 7.6           | 658.8                  | 67                         |
| V      | 1.63   | 50.6          | 650.9                  | 64                         |
| Cr     | 1.66   | 64.3          | 652.9                  | 61.5                       |
| Mn     | 1.55   | 0             | 717.3                  | 58                         |
| Fe     | 1.83   | 15.7          | 762.5                  | 55                         |
| Co     | 1.88   | 63.7          | 760.4                  | 54.5                       |
| Ni     | 1.91   | 112           | 737.1                  | 56                         |
| Cu     | 1.9    | 118.4         | 745.5                  | 54                         |
| Zn     | 1.65   | 0             | 906.4                  | none                       |
| Mo     | 2.16   | 71.9          | 684.3                  | 69                         |
| Tc     | 1.9    | 53            | 702                    | none                       |
| Ru     | 2.2    | 101.3         | 710.2                  | 68                         |
| Rh     | 2.28   | 109.7         | 719.7                  | 66.5                       |
| Pd     | 2.2    | 53.7          | 804.4                  | 76                         |
| Ag     | 1.93   | 125.6         | 731                    | 75                         |
| Cd     | 1.69   | 0             | 867.8                  | none                       |
| Hf     | 1.3    | 0             | 658.5                  | none                       |
| Ta     | 1.5    | 31            | 761                    | 72                         |
| W      | 2.36   | 78.6          | 770                    | none                       |
| Re     | 1.9    | 14.5          | 760                    | none                       |
| Os     | 2.2    | 106.1         | 840                    | none                       |
| Ir     | 2.2    | 151           | 880                    | 68                         |
| Pt     | 2.28   | 205.3         | 870                    | none                       |
| Au     | 2.54   | 222.8         | 890.1                  | 85                         |

**Table S3** Summary of d-band centre of the doped atom ( $\varepsilon_d$ ), the p-band center of the O<sub>1</sub> atom ( $\varepsilon_p$ ), the charge-transfer energy ( $\Delta$ ), and the Bader charge transfer of the doped atom ( $\Delta q$ ).

| <b>Dopant</b> | $\varepsilon_d$ (eV) | $\varepsilon_p$ (eV) | $\Delta$ (eV) | $\Delta q$ (e) |
|---------------|----------------------|----------------------|---------------|----------------|
| <b>2Ti</b>    | -0.293               | -3.634               | 5.701         | -1.813         |
| <b>3V</b>     | -1.138               | -3.941               | 5.432         | -1.706         |
| <b>4Cr</b>    | -1.204               | -3.953               | 5.301         | -1.597         |
| <b>5Mn</b>    | -1.029               | -3.814               | 5.257         | -1.416         |
| <b>8Ni</b>    | -1.138               | -3.359               | 4.507         | -0.998         |
| <b>11Mo</b>   | -1.874               | -4.193               | 5.808         | -1.906         |
| <b>14Rh</b>   | -1.707               | -3.812               | 5.488         | -0.978         |
| <b>17Cd</b>   | -4.138               | -3.121               | 4.561         | -1.166         |

Table S4 ICOHP values for La–O<sub>1</sub> and La–O<sub>2</sub> bonds in stable configurations

| <b>Dopant</b> | <b>La-O<sub>1</sub></b> | <b>La-O<sub>2</sub></b> |
|---------------|-------------------------|-------------------------|
| <b>Ti</b>     | -0.100                  | -0.250                  |
| <b>V</b>      | -0.138                  | -0.336                  |
| <b>Cr</b>     | -0.140                  | -0.342                  |
| <b>Mn</b>     | -0.129                  | -0.279                  |
| <b>Ni</b>     | -0.255                  | -0.312                  |
| <b>Mo</b>     | -0.093                  | -0.331                  |
| <b>Rh</b>     | -0.146                  | -0.406                  |
| <b>Cd</b>     | -0.236                  | -0.282                  |

Table S5 Comparison of adsorption site, structural parameters ( $d(\text{M-C})$  and  $d(\text{C-O})$ , Å), Bader charge transfer ( $Q$ ,  $e$ ), and adsorption energies ( $E_{\text{ads}}$ , eV) for CO adsorption on Ti-, V-, Cr-, Ni-, Mo-, Rh-, and Cd-doped  $\text{LaMnO}_3$  surfaces, obtained from non-spin-polarized (NSP) and spin-polarized (SP) calculations.

| <b>Dopant</b> | <b>Calculation Method</b> | <b>Adsorption Site</b> | <b><math>d(\text{M-C})</math></b> | <b><math>d(\text{C-O})</math></b> | <b><math>Q</math></b> | <b><math>E_{\text{ads}}</math></b> |
|---------------|---------------------------|------------------------|-----------------------------------|-----------------------------------|-----------------------|------------------------------------|
| <b>Ti</b>     | NSP                       | Ti                     | 2.214                             | 1.148                             | 0.06                  | -0.518                             |
| <b>Ti</b>     | SP                        | Ti                     | 2.284                             | 1.150                             | 0.07                  | -0.229                             |
| <b>V</b>      | NSP                       | V                      | 1.996                             | 1.157                             | 0.13                  | -0.797                             |
| <b>V</b>      | SP                        | V                      | 1.965                             | 1.166                             | 0.21                  | -0.842                             |
| <b>Cr</b>     | NSP                       | Cr                     | 1.846                             | 1.166                             | 0.14                  | -1.215                             |
| <b>Cr</b>     | SP                        | Cr                     | 1.968                             | 1.154                             | 0.10                  | -0.960                             |
| <b>Ni</b>     | NSP                       | Ni                     | 1.763                             | 1.162                             | 0.14                  | -1.086                             |
| <b>Ni</b>     | SP                        | Ni                     | 1.794                             | 1.163                             | 0.24                  | -0.629                             |
| <b>Mo</b>     | NSP                       | Mo                     | 1.975                             | 1.171                             | 0.29                  | -1.614                             |
| <b>Mo</b>     | SP                        | Mo                     | 1.904                             | 1.193                             | 0.50                  | -1.670                             |
| <b>Rh</b>     | NSP                       | Rh                     | 1.812                             | 1.169                             | 0.08                  | -1.553                             |
| <b>Rh</b>     | SP                        | Rh                     | 1.850                             | 1.173                             | 0.19                  | -1.214                             |
| <b>Cd</b>     | NSP                       | Cd                     | 2.390                             | 1.149                             | 0.05                  | -0.277                             |
| <b>Cd</b>     | SP                        | Cd                     | 2.321                             | 1.160                             | 0.14                  | -0.305                             |
